# Supplementary material
Source: Springer Nature journal article supplement (https://www.springermedizin.de/resource/supplementary/12885_2001_10_MOESM3_ESM.pdf/9460004)

# LoVo

0 PDL

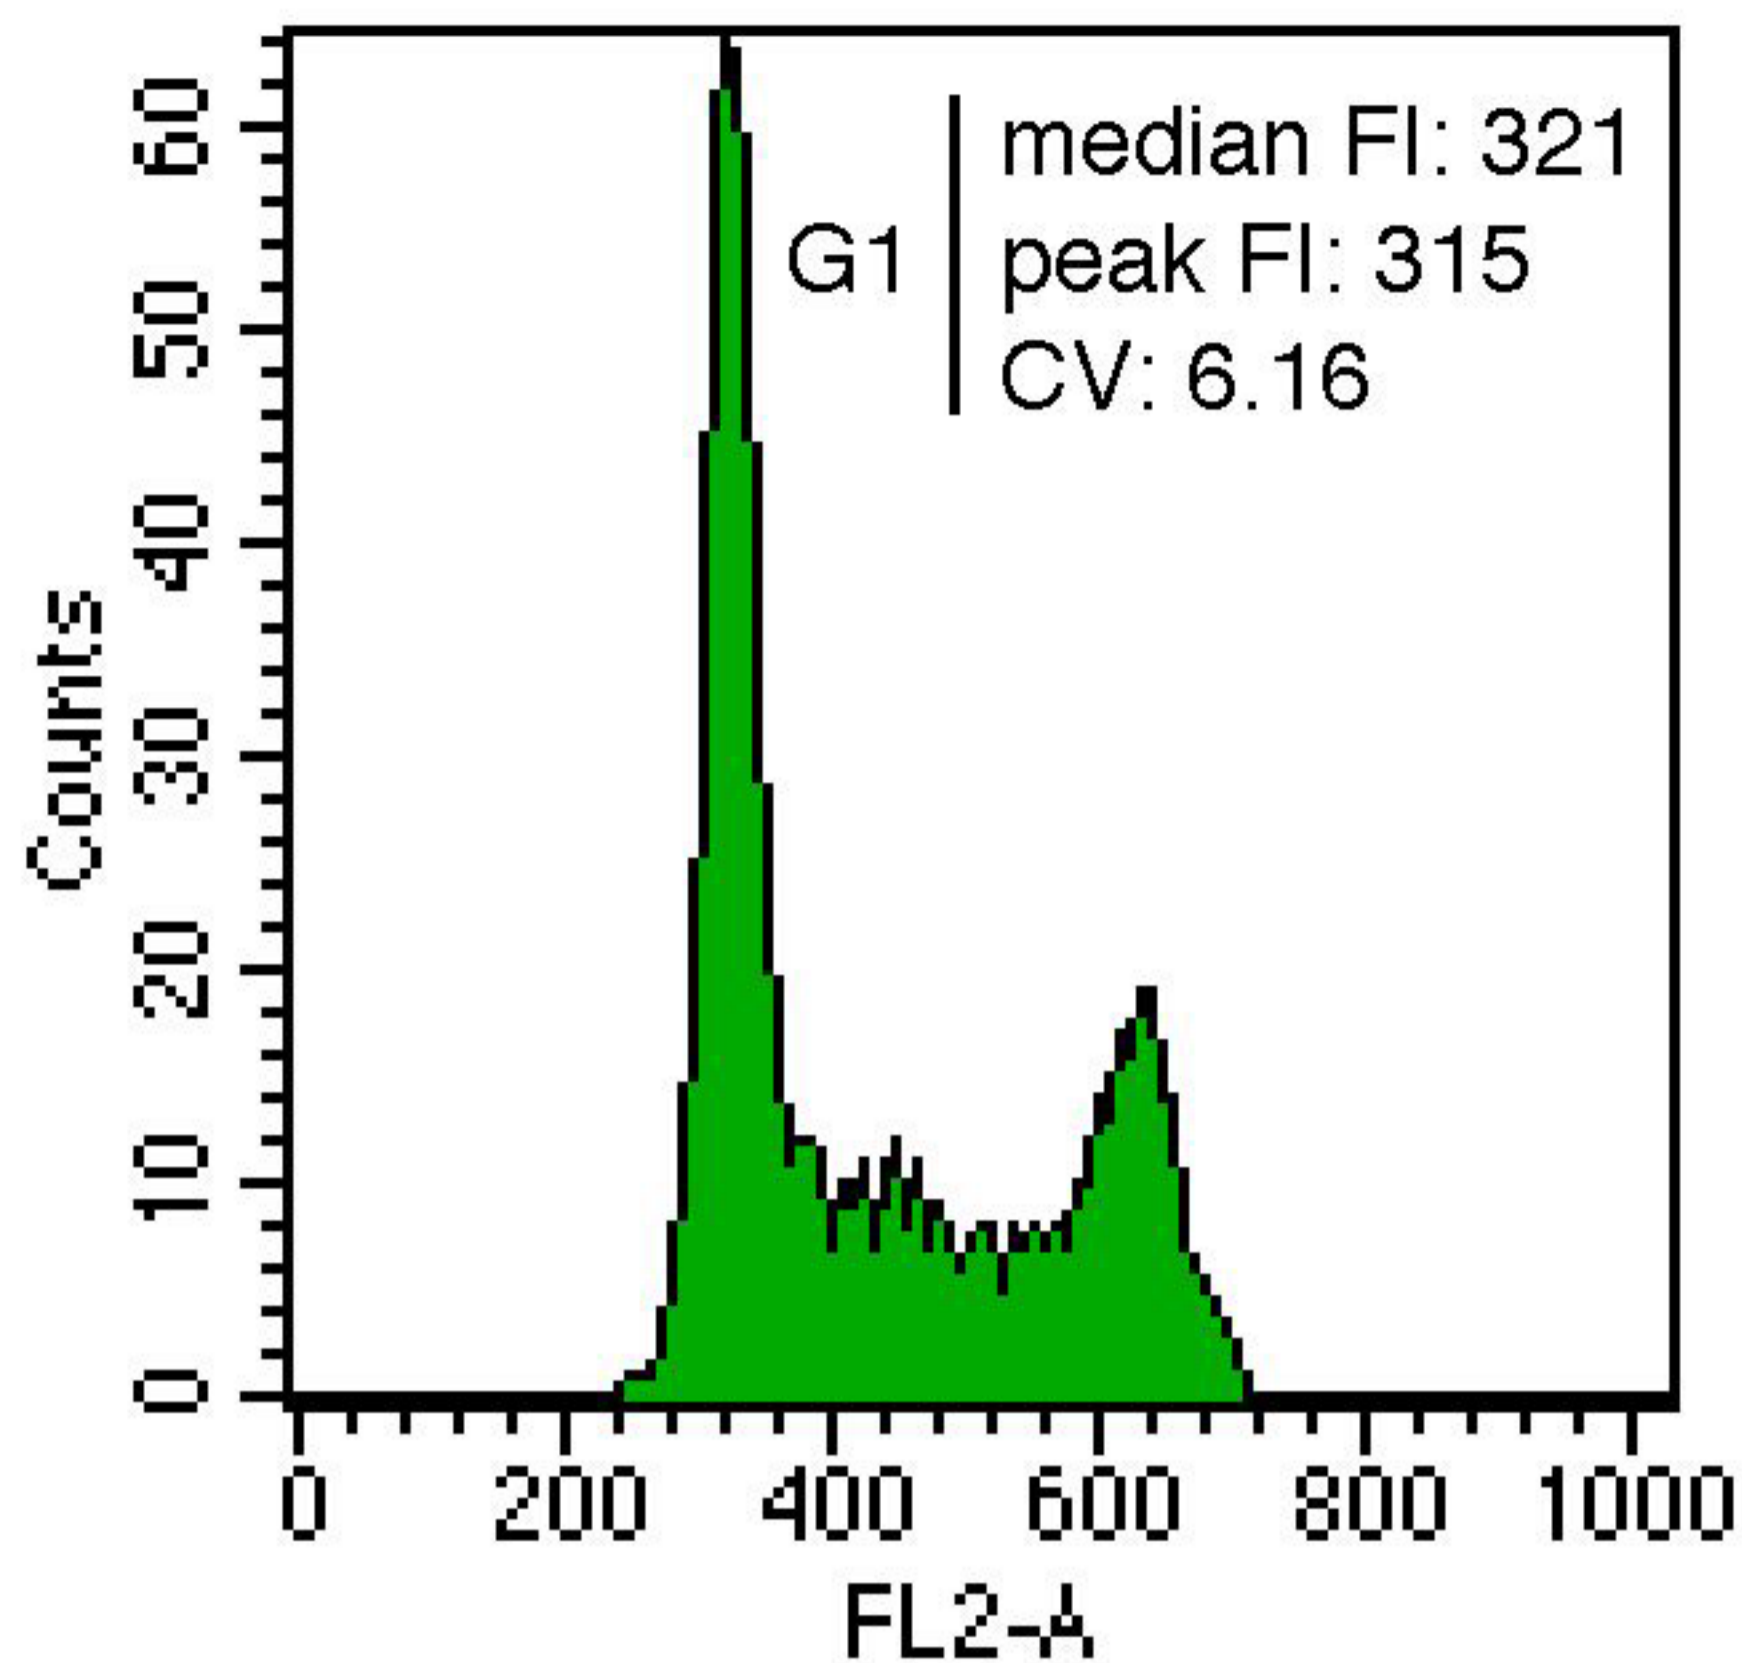

15 PDL

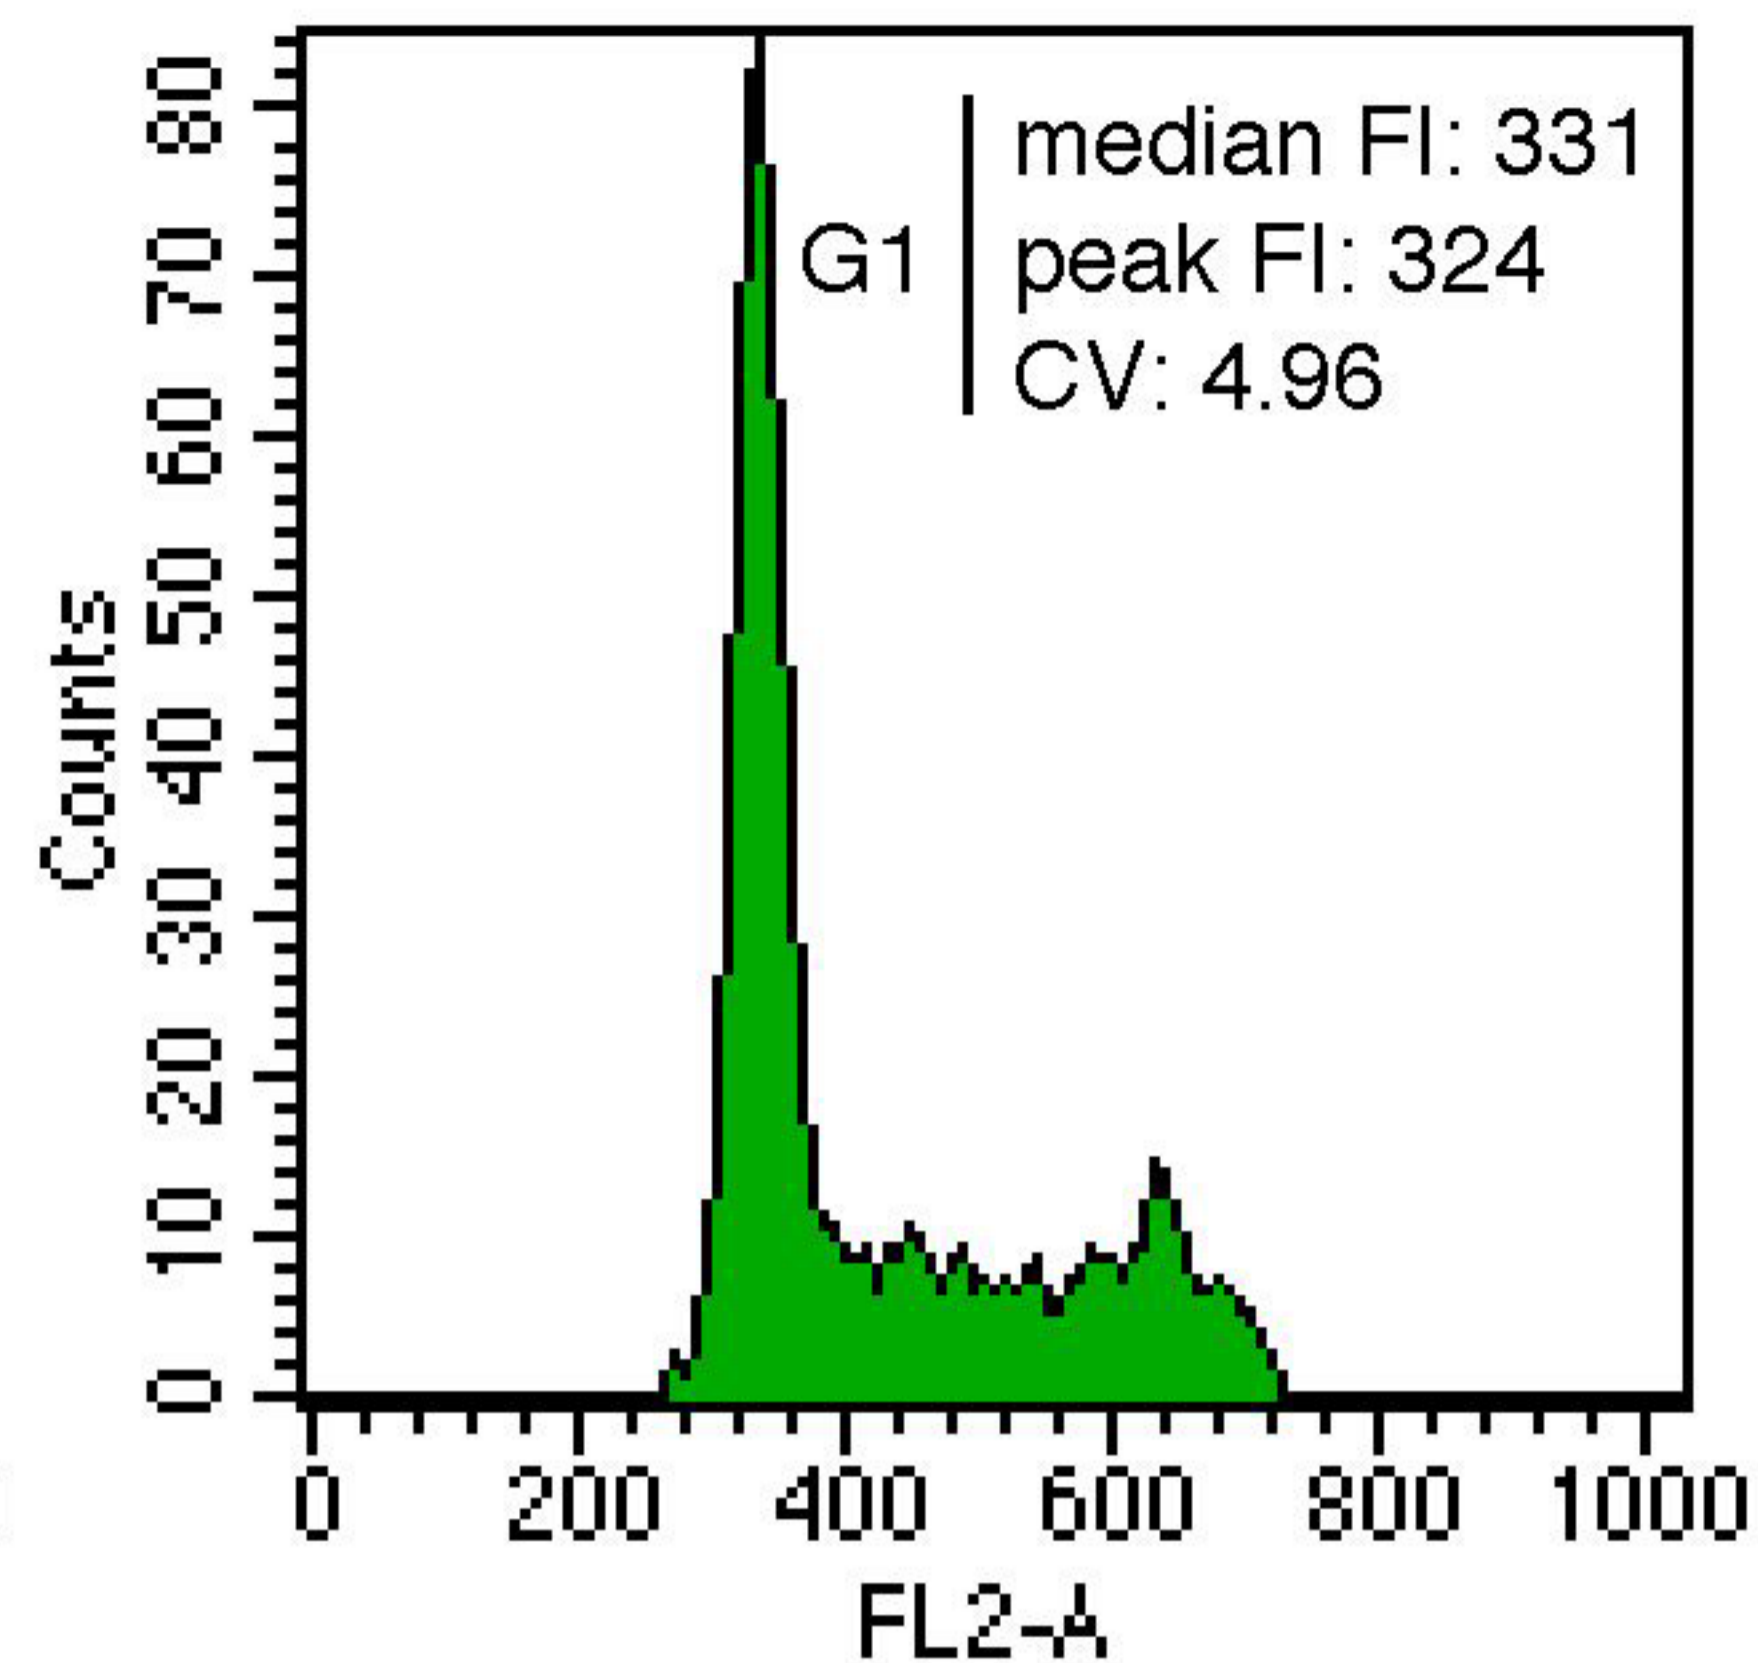

39 PDL

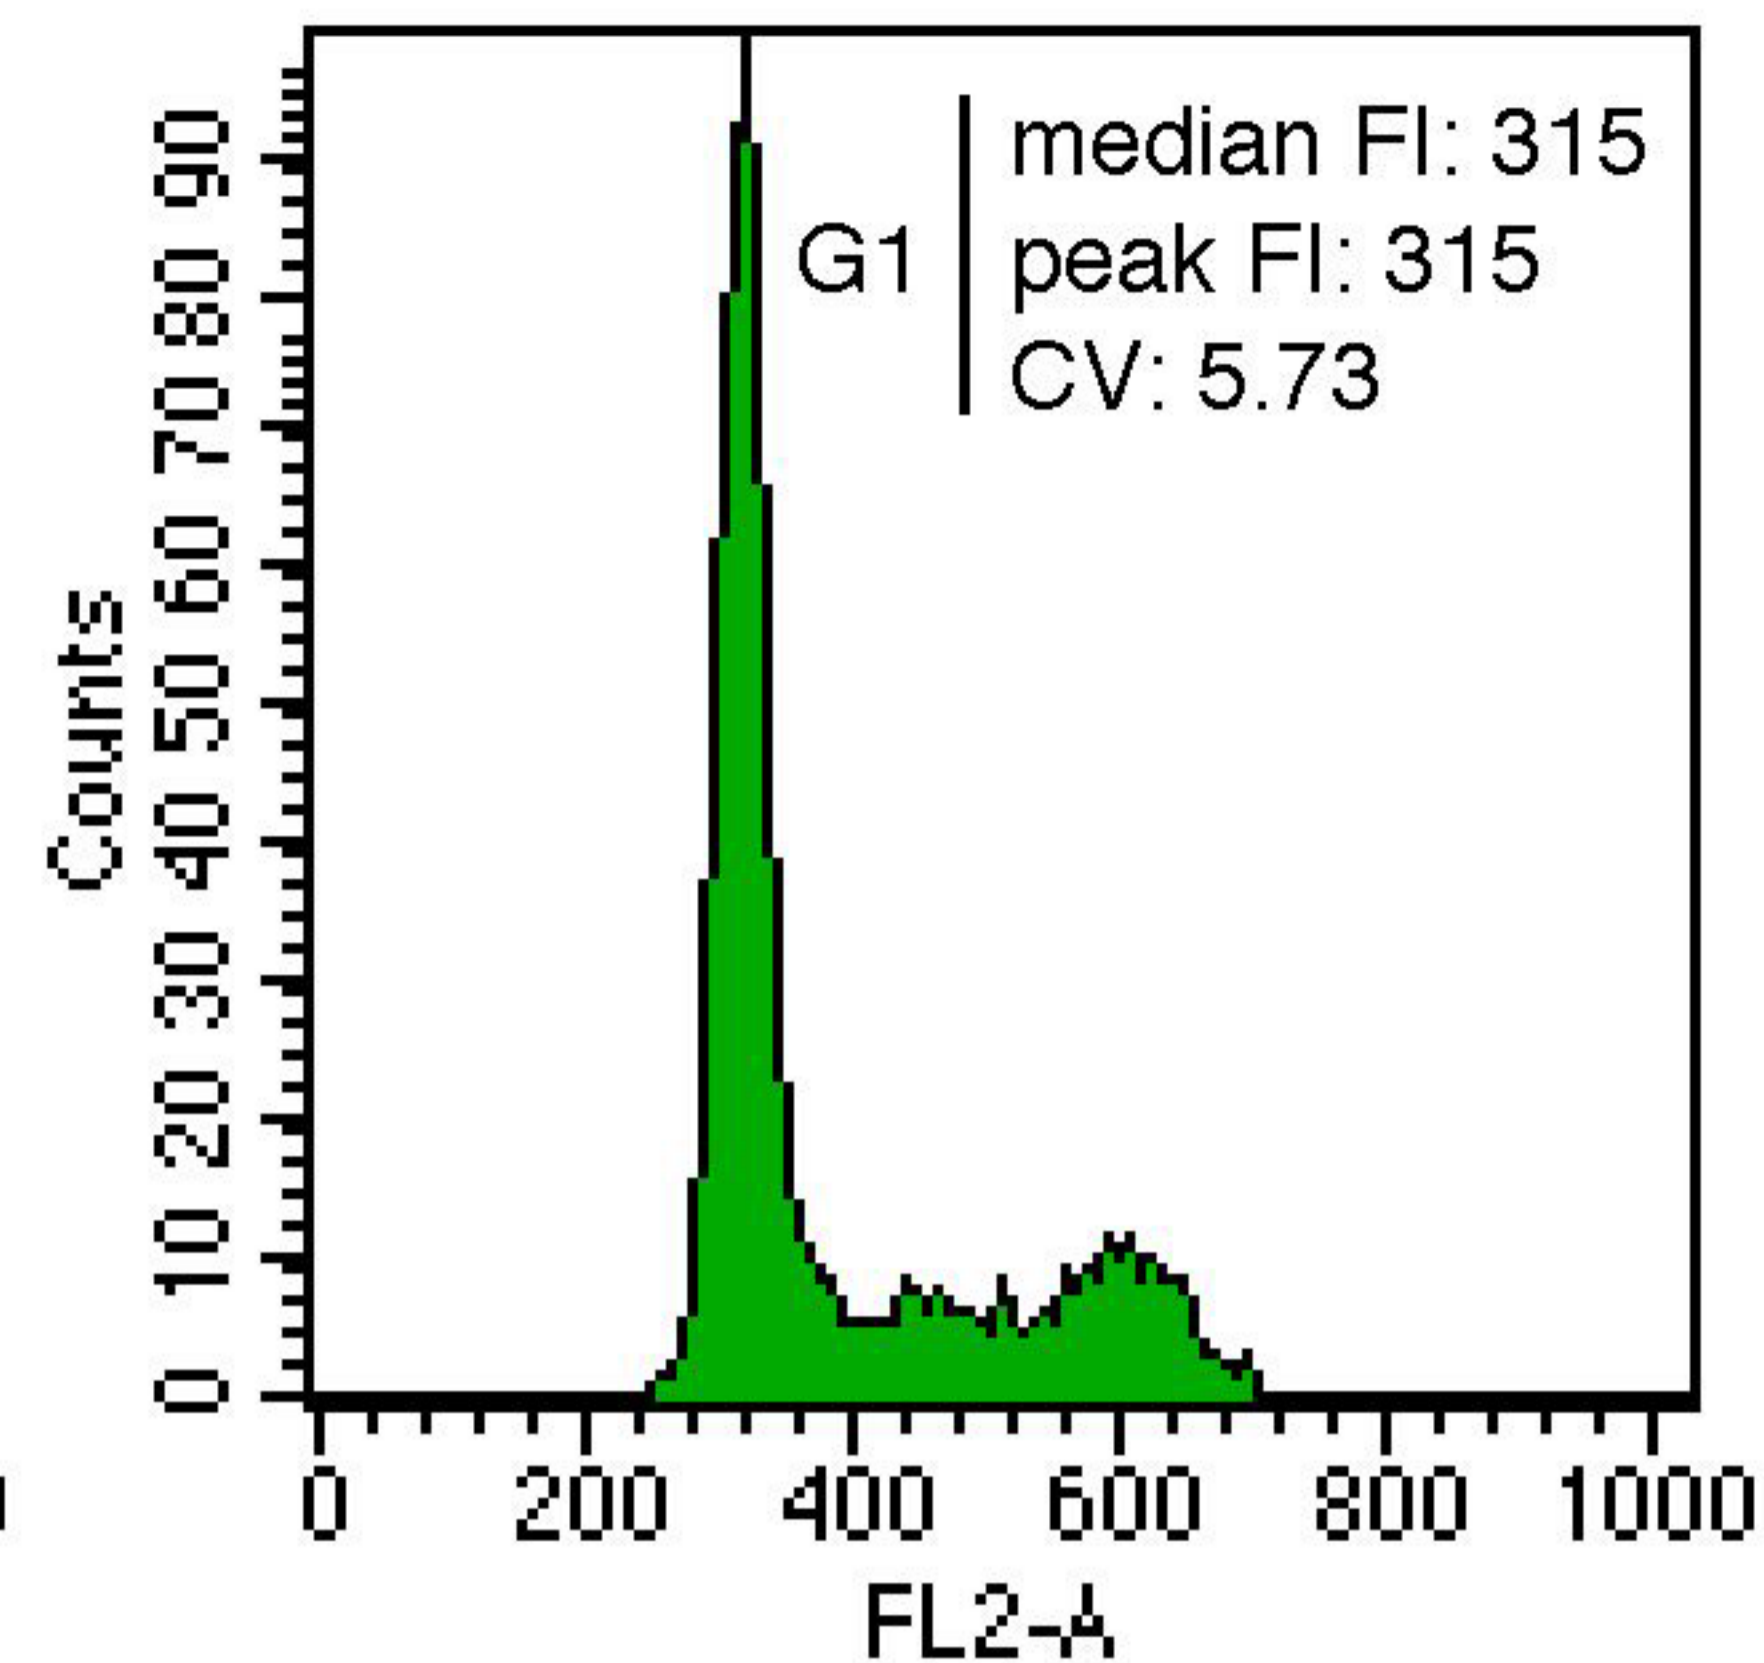

# DLD-1

0 PDL

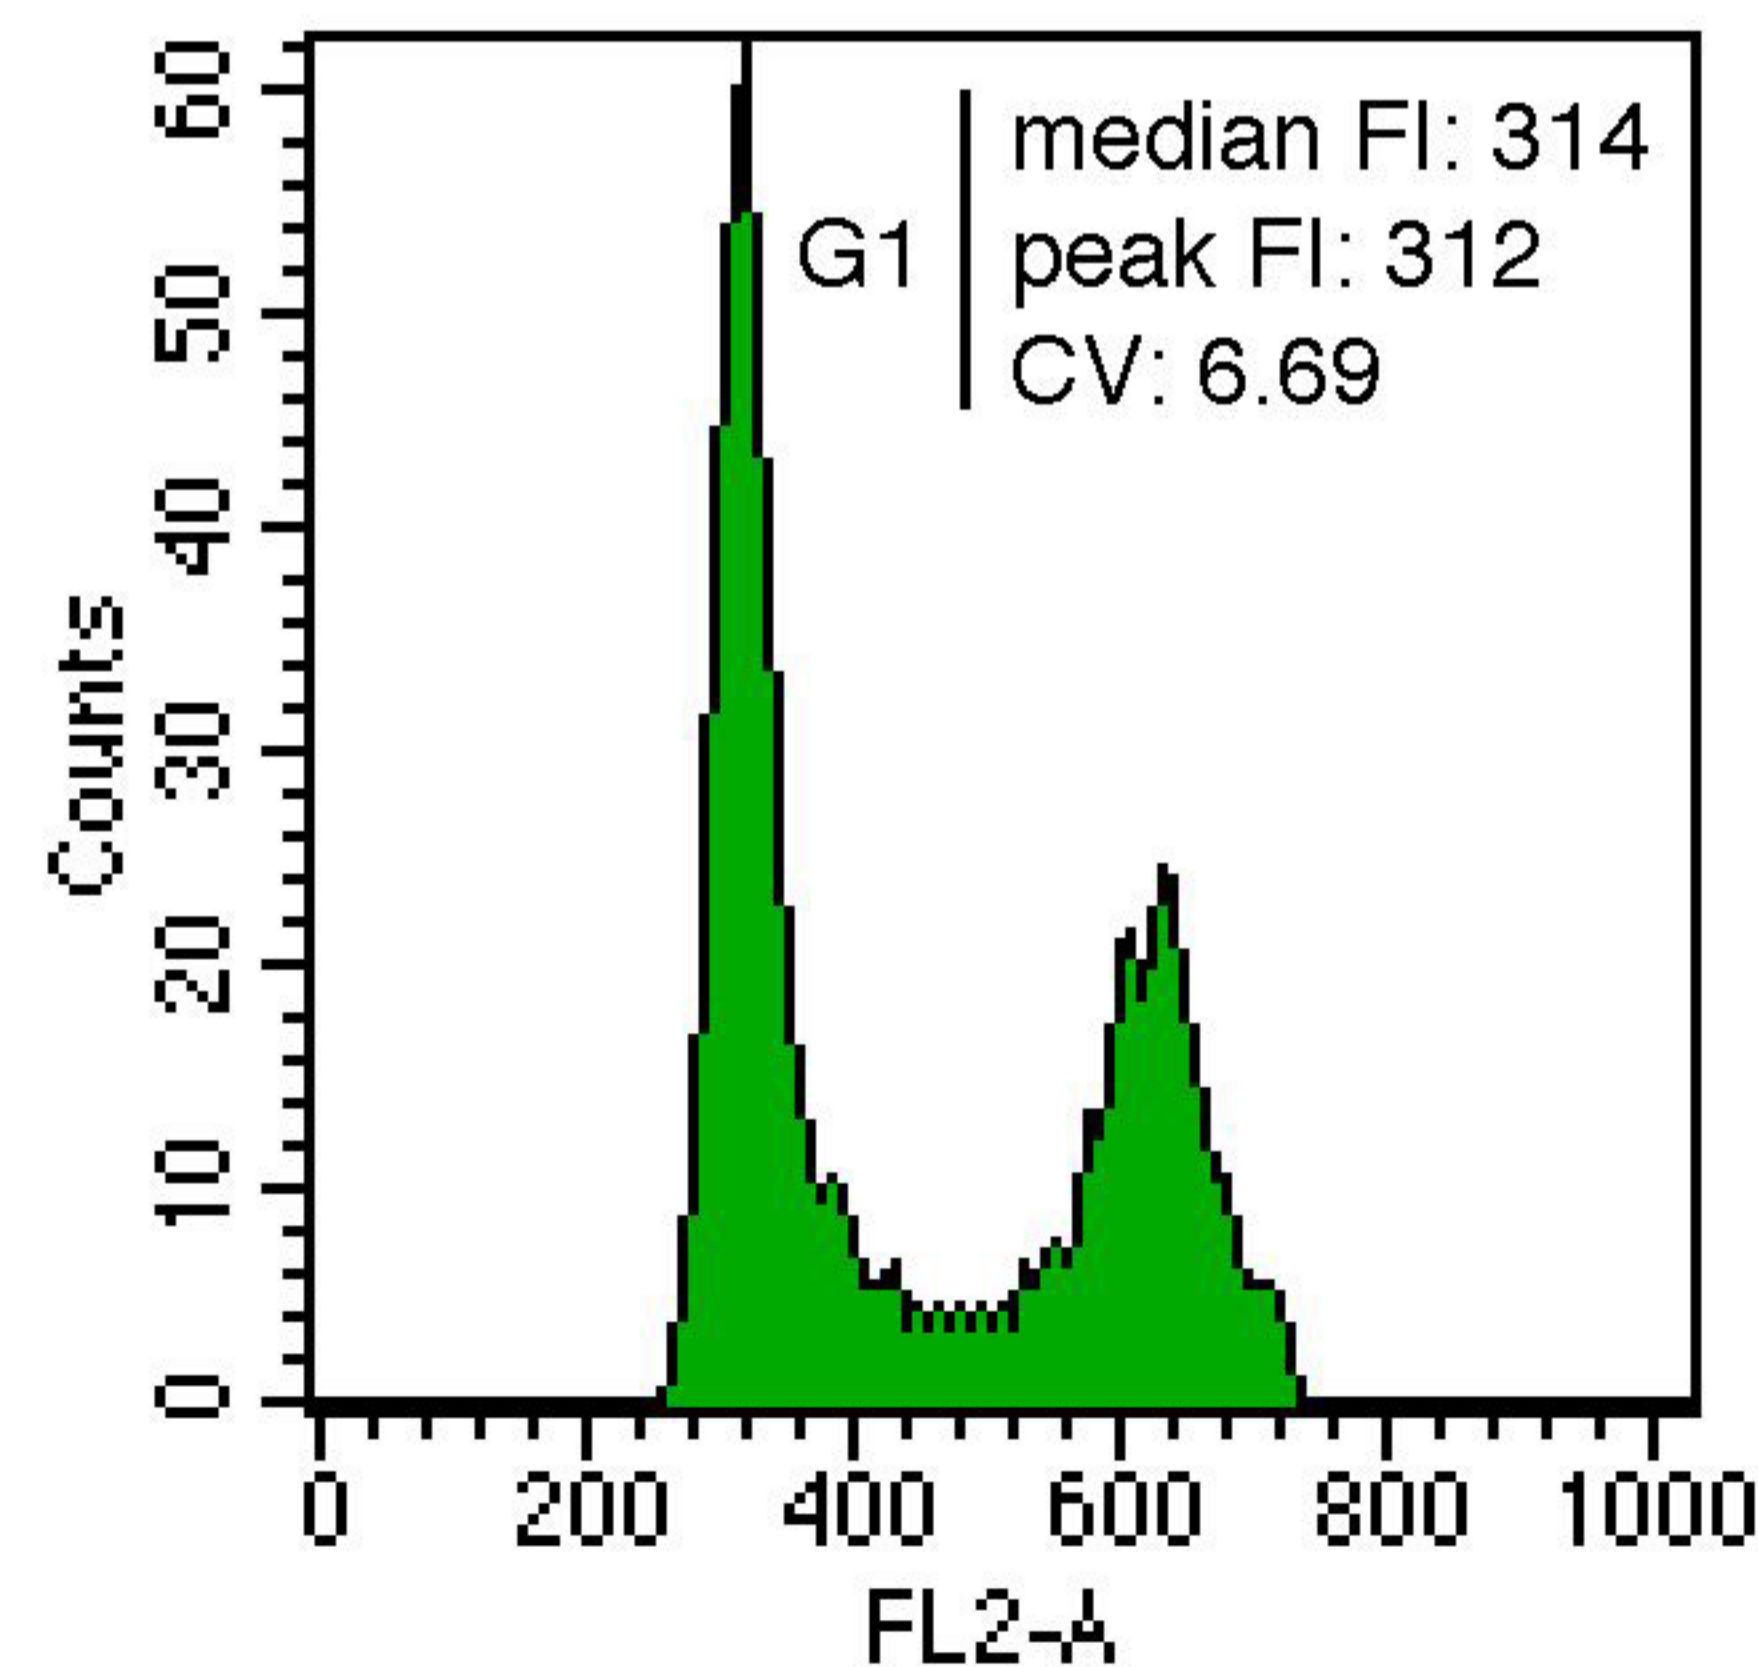

27 PDL

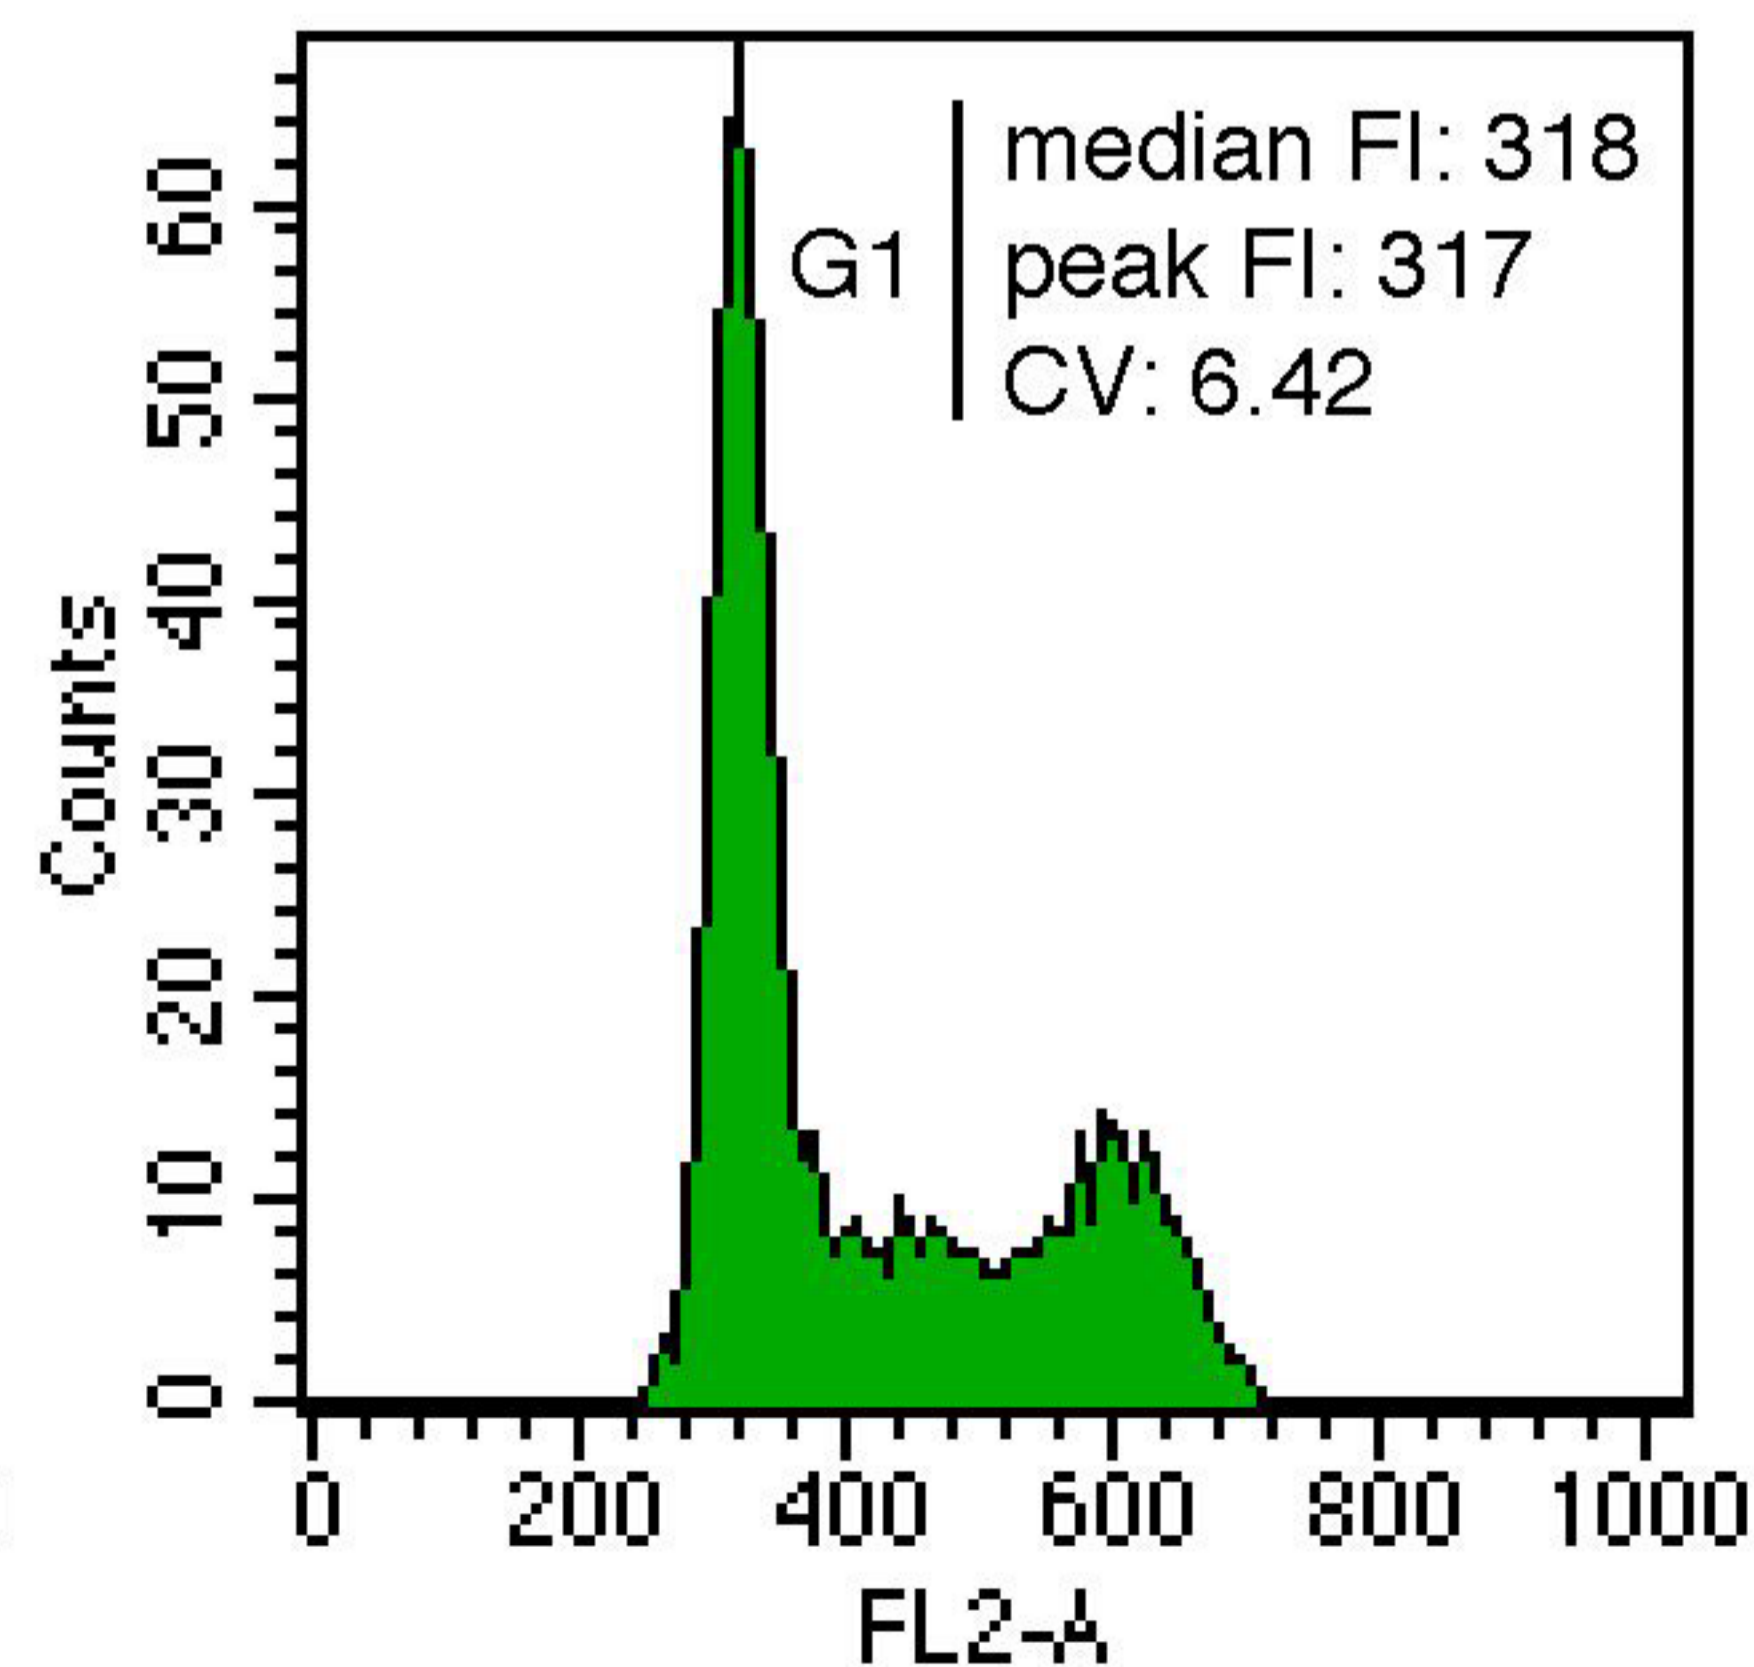

58 PDL

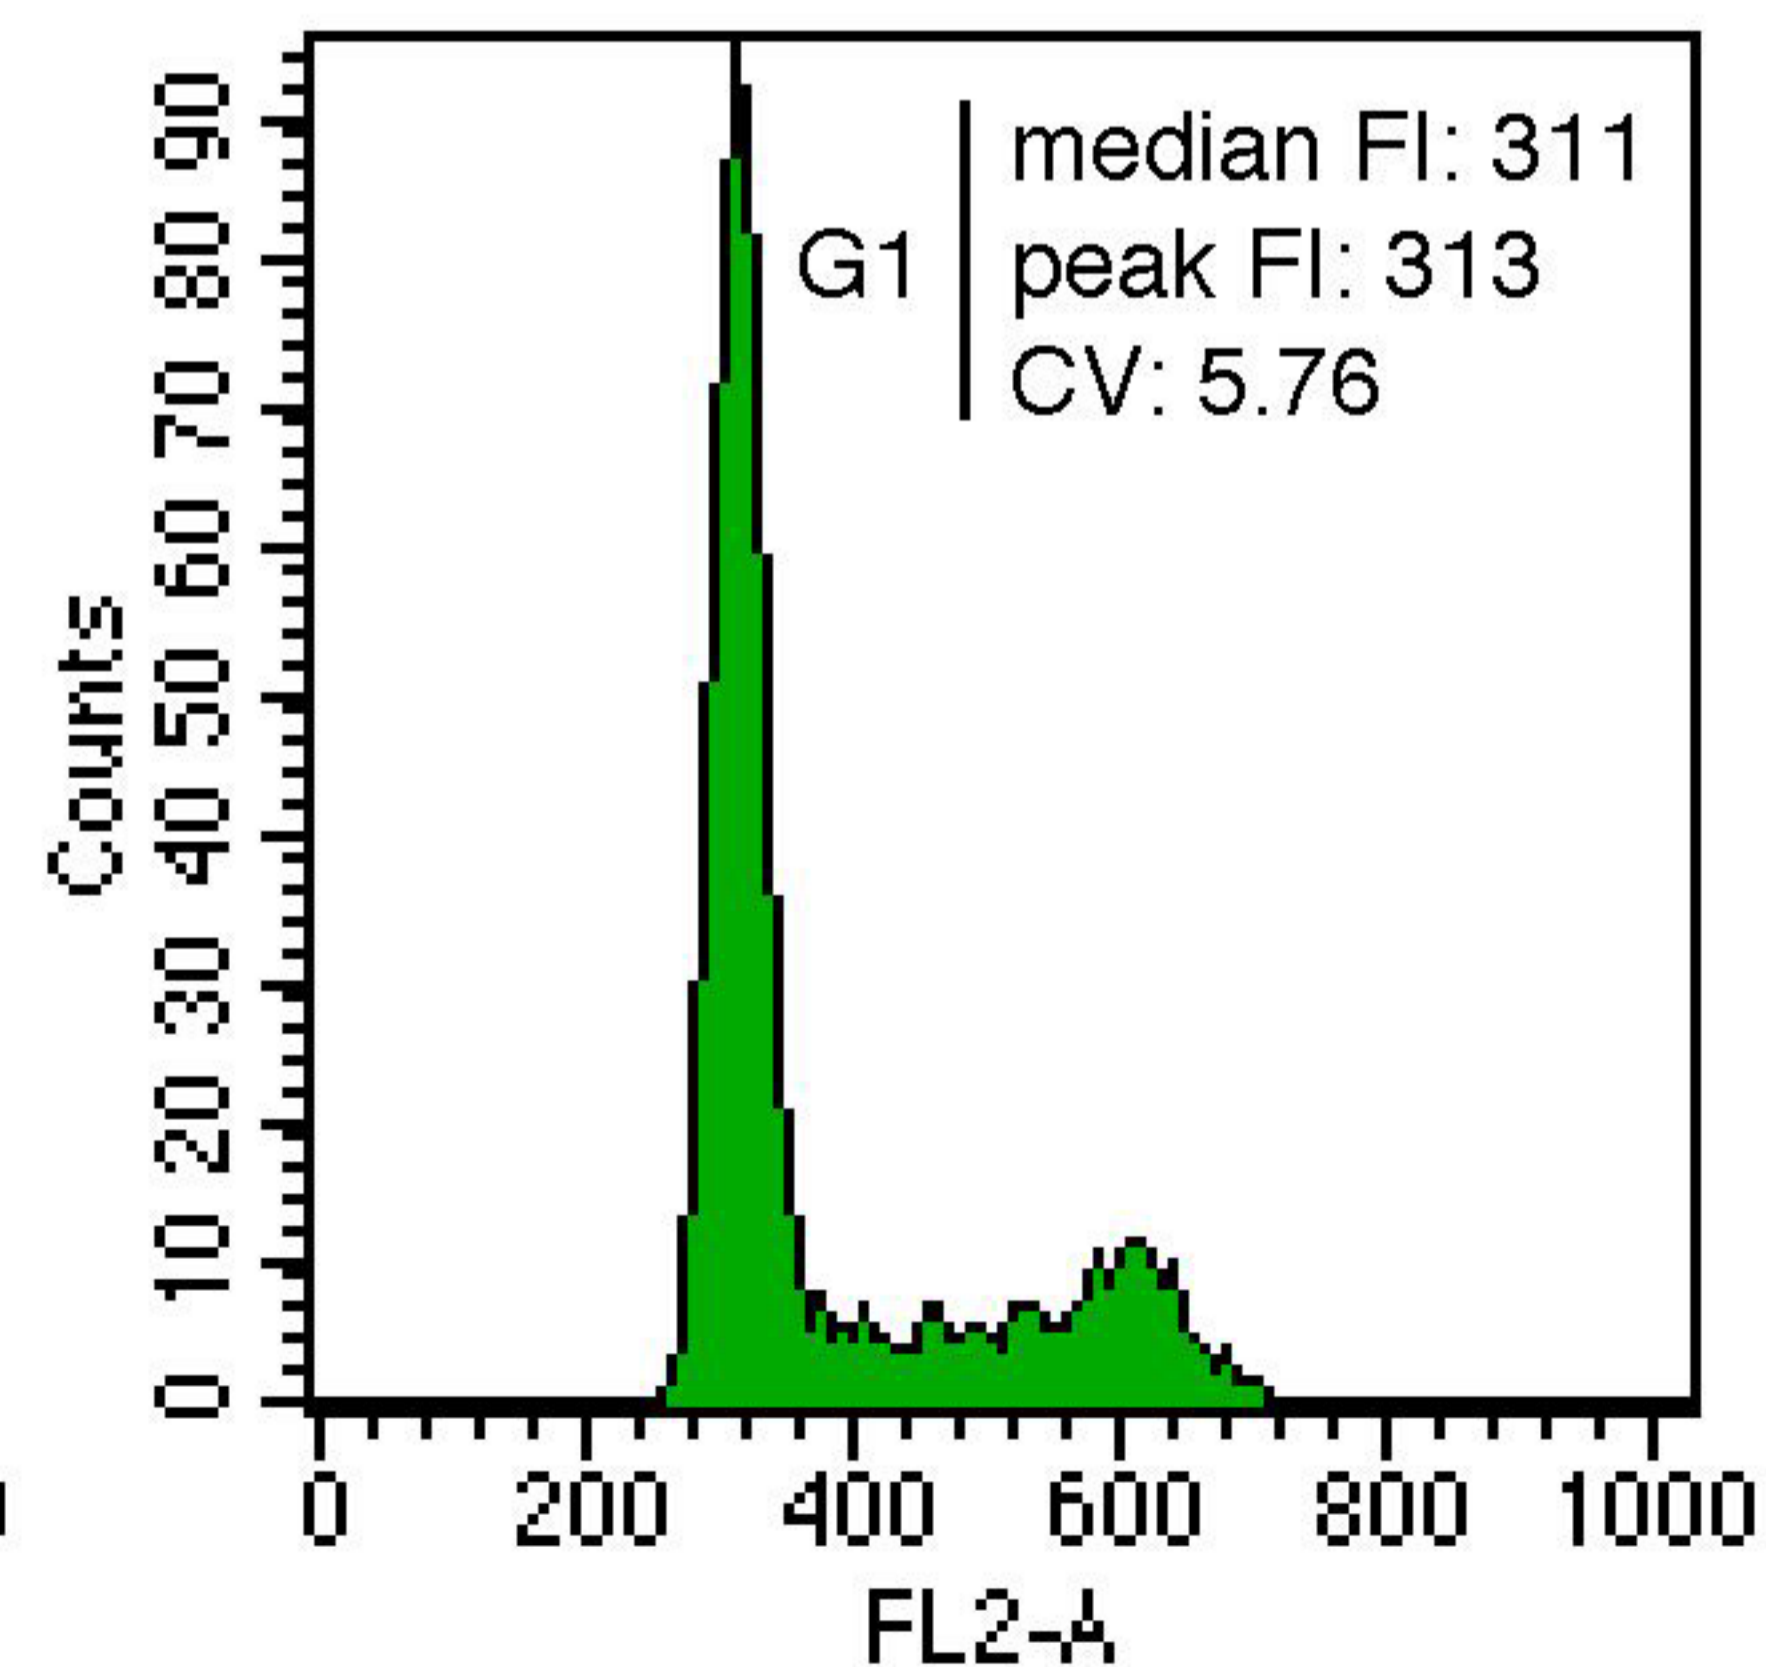

Supplement: MOESM3 [file 9460004]
